# Supplementary material for: The androgen-induced protein AIbZIP facilitates proliferation of prostate cancer cells through downregulation of p21 expression
Source: PubMed Central journal article supplement (PMC5112536; doi:10.1038/srep37310), 2016-11-17
Supplement: srep37310-s1.pdf [file srep37310-s1.pdf]

# The androgen-induced protein AlbZIP facilitates proliferation of prostate cancer cells through downregulation of p21 expression

Xiang Cui, Min Cui, Rie Asada, Soshi Kanemoto, Atsushi Saito, Koji Matsuhisa, Masayuki Kaneko  
& Kazunori Imaizumi

## Supplementary Information

# Supplementary Figure S1.

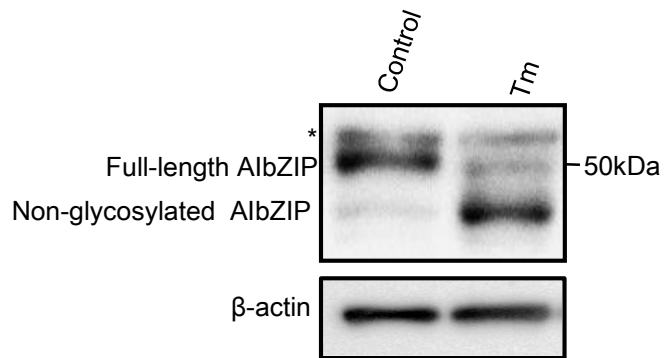

**Supplementary Figure S1. WB analysis for AlbZIP in LNCaP cells treated with tunicamycin**  
LNCaP cells were treated with 3  $\mu$ g/ml tunicamycin (Tm). Asterisk: nonspecific bands.  $\beta$ -actin was used as a loading control.

# Supplementary Figure S2.

-1K GGCAAAAAATAAAAAATAATCAATCAACCCTGAGTTTTGGTATTACTACTTTCTAGTCATGGATCTGCCTCCTCATAGG  
TAAAATTTGCAAAATATTACCCGCCGTGTGTGCCTCAGAAGTGTATGGATTAAAGGAAGAGAACAATTTTTATGAAAA  
CGTTTTGTAAATTATACAAGTGTGGGACATAATGTTCCCGGTAAGTGTATGCAAACAATAAGACAACAACGCAAAAG  
GCTTTTTAACTTGTTGCAGTTTTCTGCCCGTGTCCCTCCGTGAATGAGCAGCGTGCAGCGAGCGTGTGCGCACA  
GCTGCTGTTCTCCATTAACGCCACACTGCTCGGCTTGCAGGCGGGGAACCCGCCATCGCGCTCCTGCCGCCTGC  
CGAGCGAGGGATCACCGCTCCACTGGGGTCAGCGGGCTGTTGACTCCCCGCCTGGGTGAAACCGGAGCTTCCGAGT  
CACGTGGCGCGCGAAGACAAACCTGGCTGCTCAGGGTTTCCCGGAGCTTTCTCCAGCTTCCCGGCGATTTCATATT  
CTGGCGCTTACCCCTCCCTTTAGGCTGGCGGAACCAATCCCCGCCTGACAAATAAGTCCCGCCGGCCGGACGCA  
GTGGCTCGCGCCTGTGGTCCTAGCTGCTCGCGGTGCTGAGGCGGGAGAATCACCTGAGCCCGGGAGGTCGGGGG  
CTGCATGGAAACCGTGATCGCACCACCGCACTCCAGCCTGGGCAACAGAGCGAGACCCTGTCTCCAAAAATAAGAAT  
AAAGAAAAAAAAAAGAAAGAACTGCGGCCCATGGCCTGACTCTCCTGAACAGCCAAACTGTCTCCGACCAGTTAC  
GGAAAGAGGCGGCCTTGAGAGGGTAGTGTGCCATTGGCTCGATGTCTGCCCCCTCCGAAACCTAAGTCTTCAGCTTC  
CAATCAGGACTCAGCTTTGGAAAGAGCGCCACGCGGTGGGCGAGGGGATGCCCTAGTAAATTGCGAGGTCTCTTG  
ACTCTTTCCG

**Supplementary Figure S2. The GGA(A/T) core sequences within the -1 kb upstream of *AlbZIP***  
Sequences colored by green indicate the GGA(A/T) core sequences.

# Supplementary Figure S3.

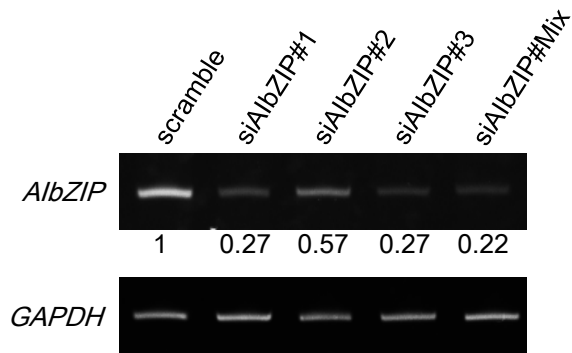

## Supplementary Figure S3. The analysis for the expressions of *AlbZIP* in LNCaP cells transfected with siRNAs targeting *AlbZIP*

RT-PCR analysis for *AlbZIP* in LNCaP cells transfected with siRNAs targeting *AlbZIP* or scramble. Each siRNA (#1, #2, #3) for *AlbZIP* decreased the expression levels of *AlbZIP* to 27%, 57%, 27% respectively. A mixture of these siRNAs reduced the mRNA level of *AlbZIP* up to 78%. The numbers represent fold changes of mRNA levels. *GAPDH* was used as an internal control.

# Supplementary Figure S4.

(a)

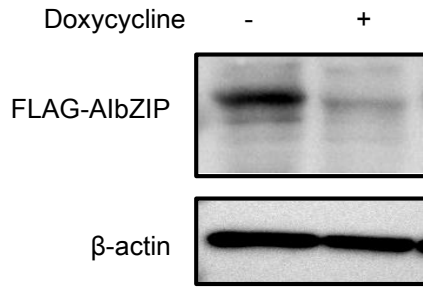

(b)

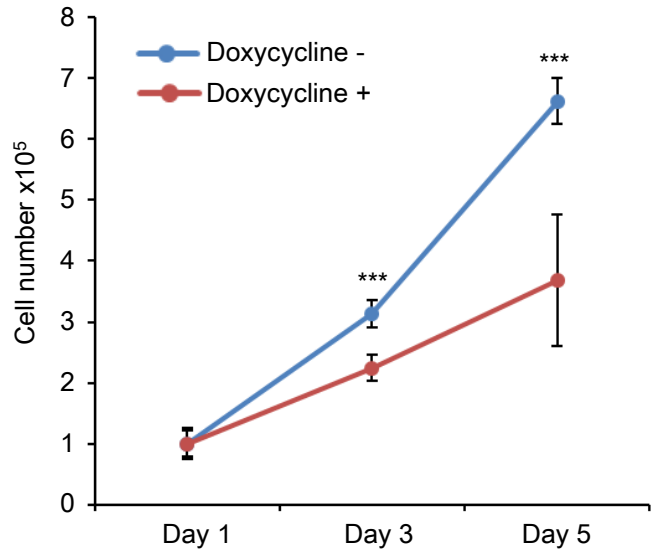

## Supplementary Figure S4. Proliferation assay for LNCaP tet-off cells stably expressing FLAG-tagged AIbZIP

(a) WB analysis for FLAG-tagged AIbZIP in the LNCaP tet-off cells treated with doxycycline or not. (b) LNCaP tet-off cells were cultured with or without doxycycline, and the numbers of cells were counted at day 1, 3 and 5 (means  $\pm$  s.d., n = 3; \*\*\*P < 0.001, vs. Doxycycline+).

# Supplementary Figure S5.

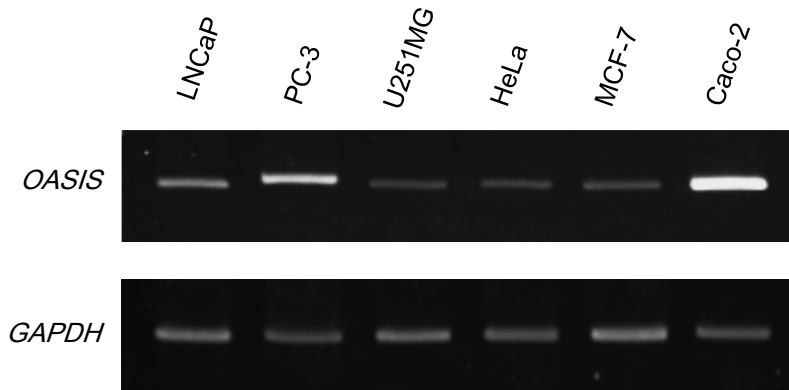

Supplementary Figure S5. RT-PCR analysis for *OASIS* in indicated cancer cell lines.

## Supplementary Figure S6.

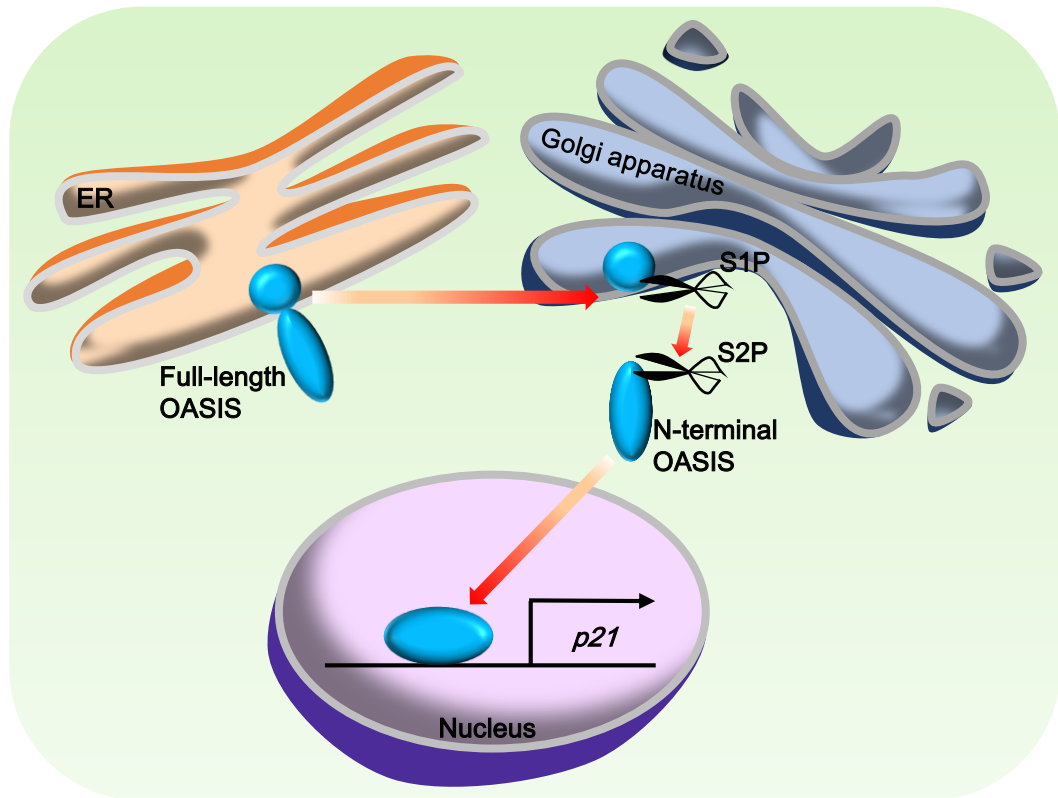

**Supplementary Figure S6. Schematic representation for the mechanism of OASIS activation**  
In response to various stimuli, OASIS is translocated from the ER to the Golgi apparatus, and sequentially cleaved by site-1 protease (S1P) and site-2 protease (S2P). Cleaved N-terminal OASIS containing transcription activation and basic leucine zipper (bZIP) domains translocate to the nucleus to promote the transcription of target genes including *p21*.

# Supplementary Figure S7.

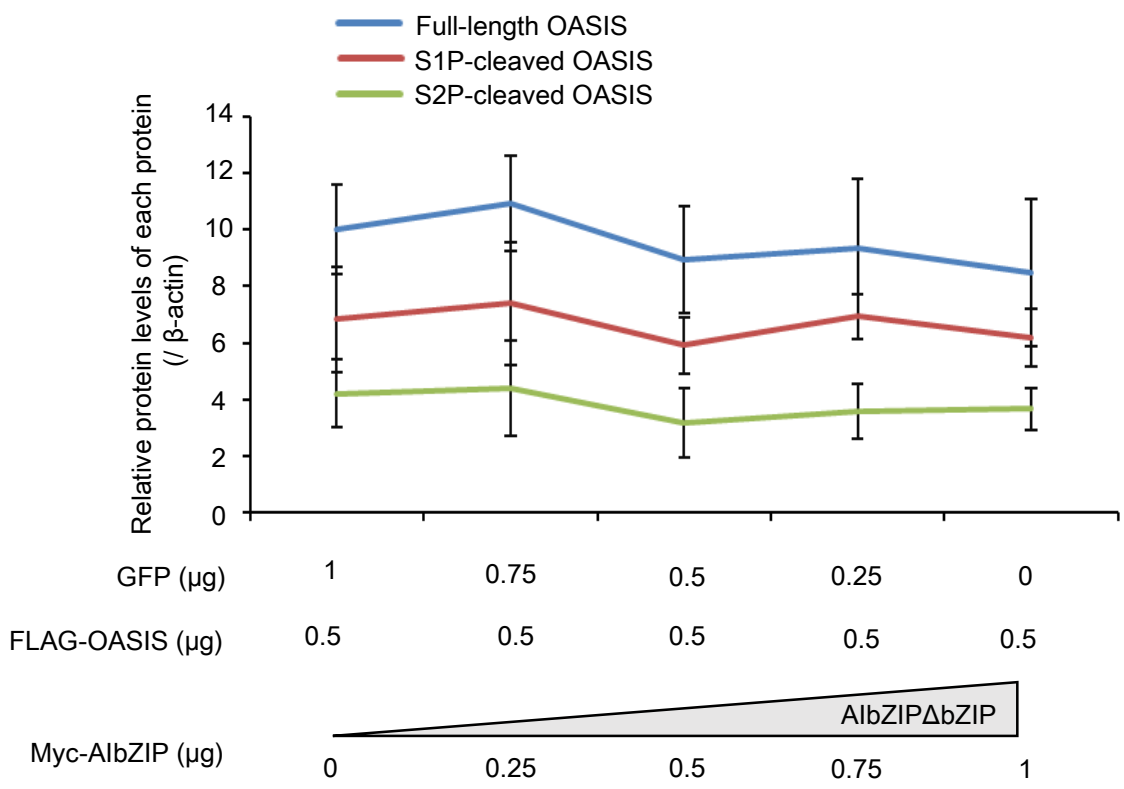

**Supplementary Figure S7. Quantification for protein levels of full-length, S1P-, and S2P-cleaved OASIS in Figure 7(e).** (means  $\pm$  s.d., n = 3).



**Supplementary Figure S8.**

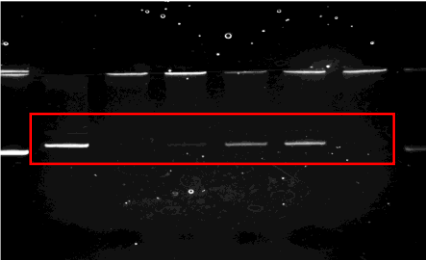

Figure 1(b) *AlbZIP*

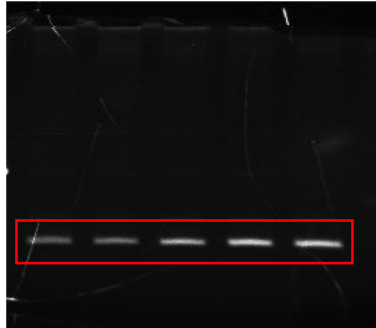

Figure 1(c) *AlbZIP*

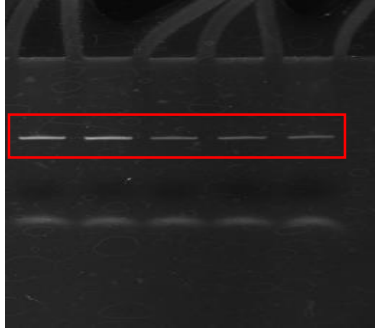

Figure 1(c) *GAPDH*

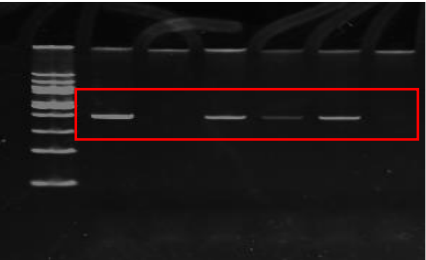

Figure 1(b) *AR*

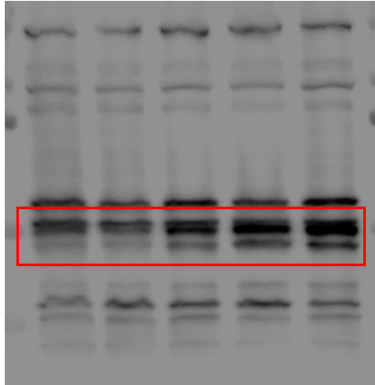

Figure 1(d) *AlbZIP*

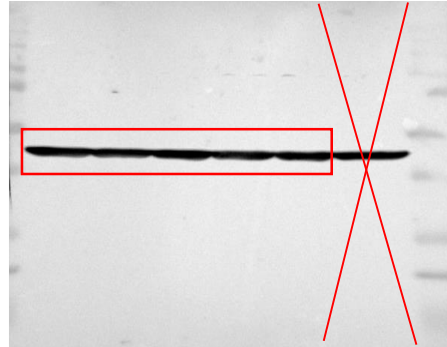

Figure 1(d)  $\beta$ -actin

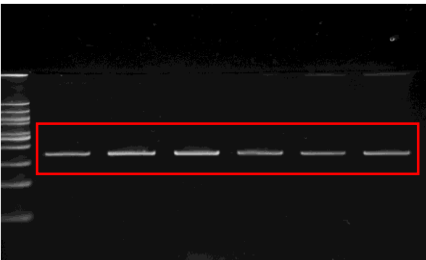

Figure 1(b) *GAPDH*

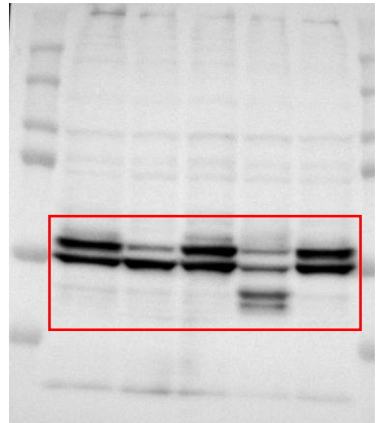

Figure 1(g) *AlbZIP*

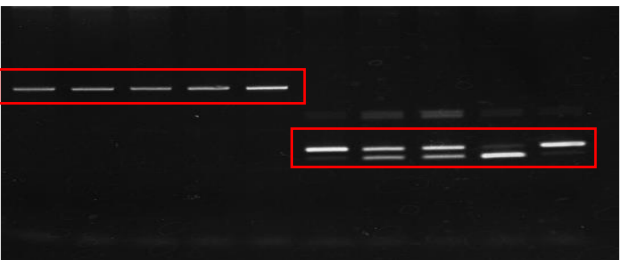

Figure 1(f) *AlbZIP*    Figure 1(f) *uXBP1, sXBP1*

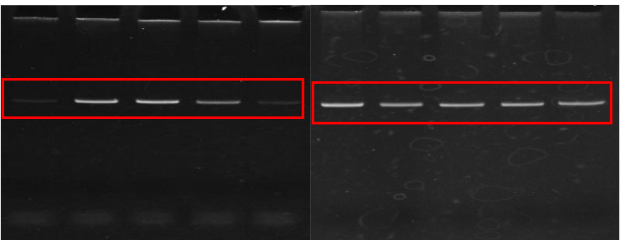

Figure 1(f) *BiP*    Figure 1(f) *GAPDH*

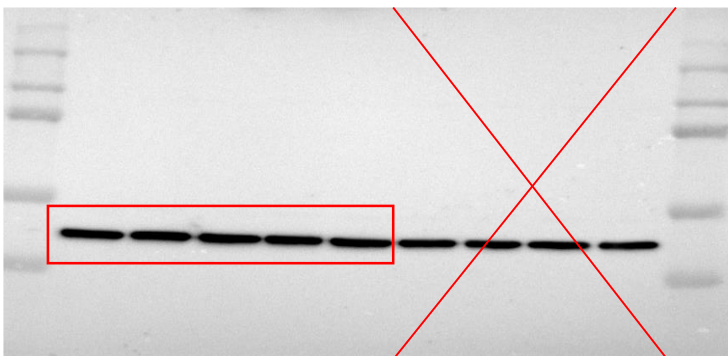

Figure 1(g)  $\beta$ -actin

# Supplementary Figure S9.

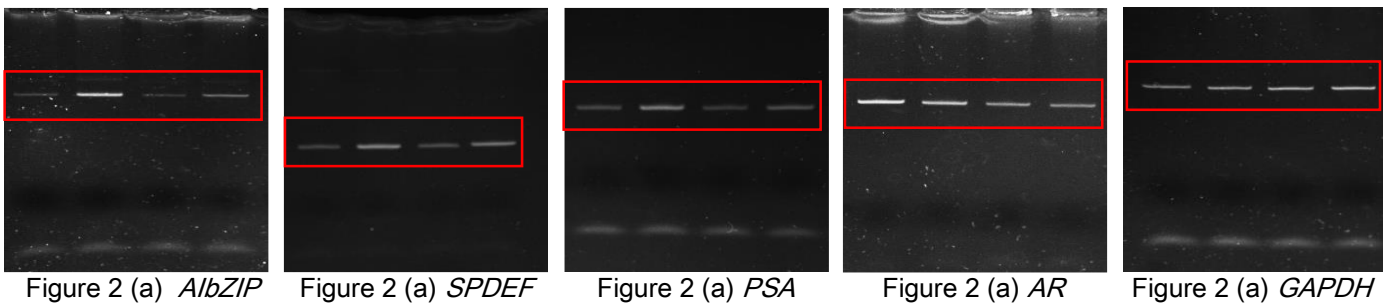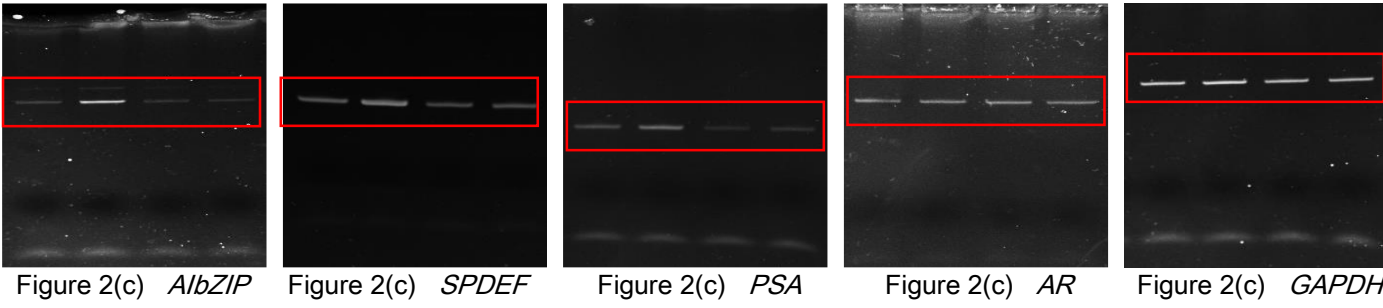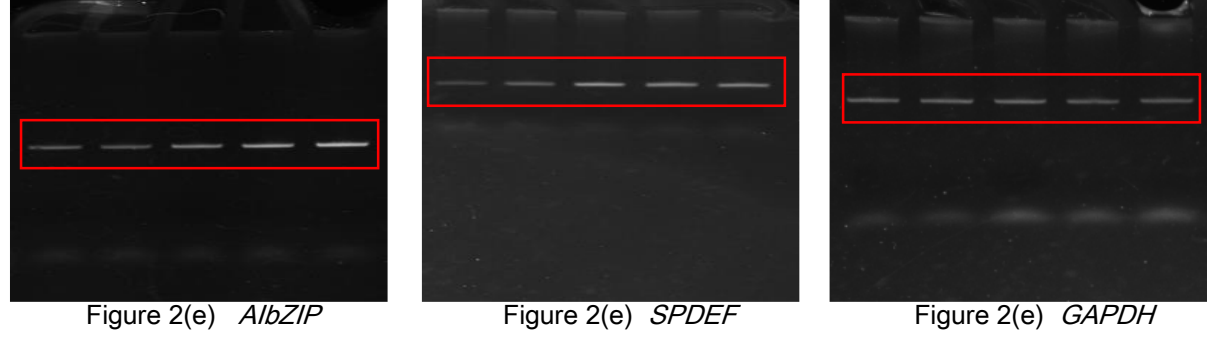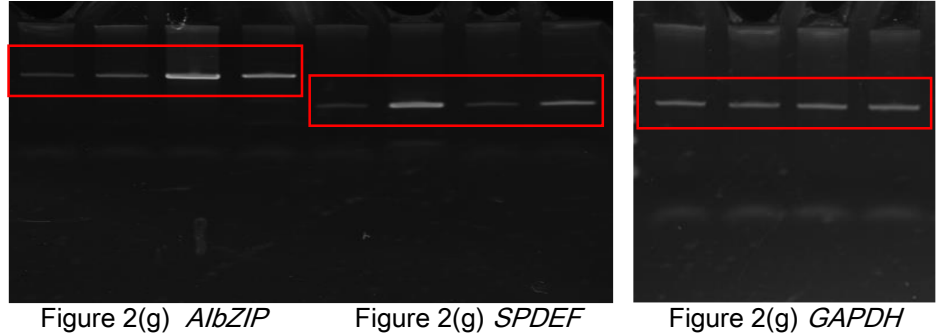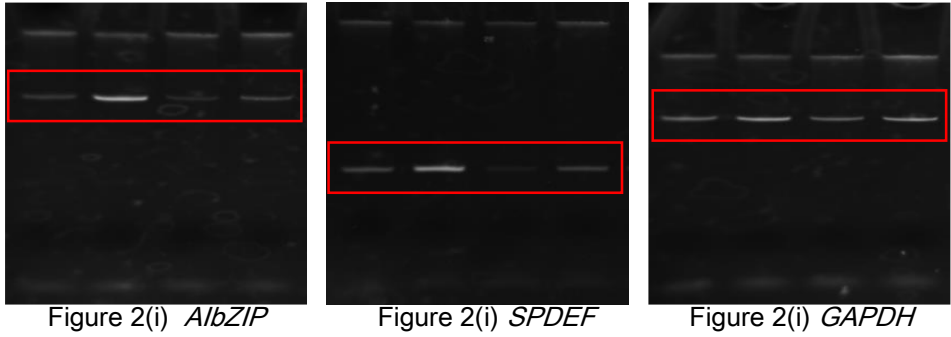

Supplementary Figure S9. Full-length gels of Figure 2(a), (c), (e), (g) and (i)

# Supplementary Figure S10.

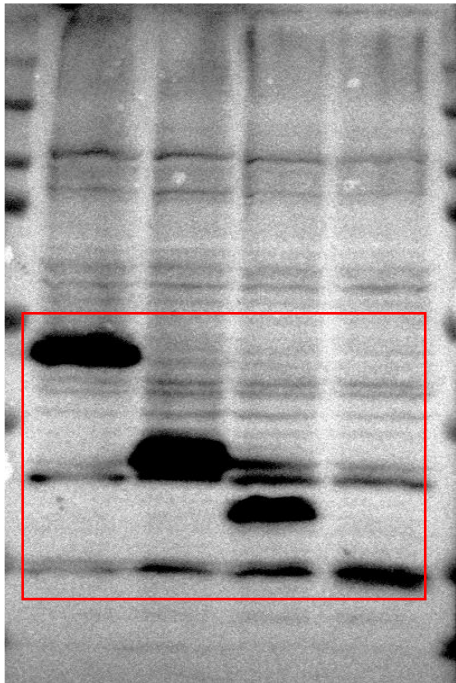

Figure 3(b) WB: anti-FLAG

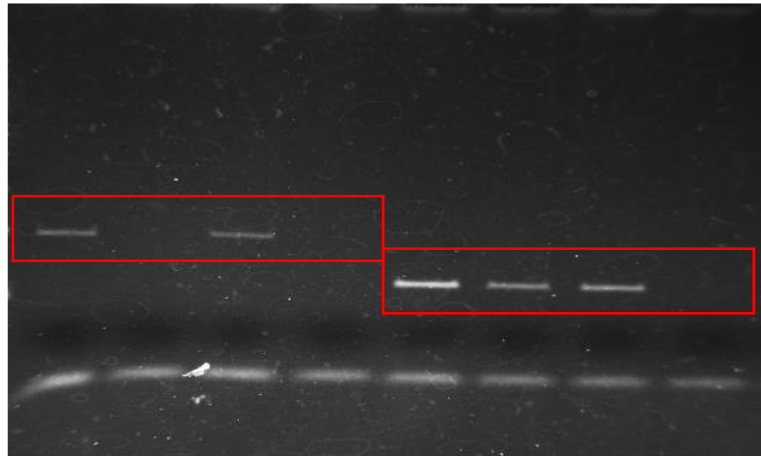

Figure 3(d) P1

Figure 3(d) P2

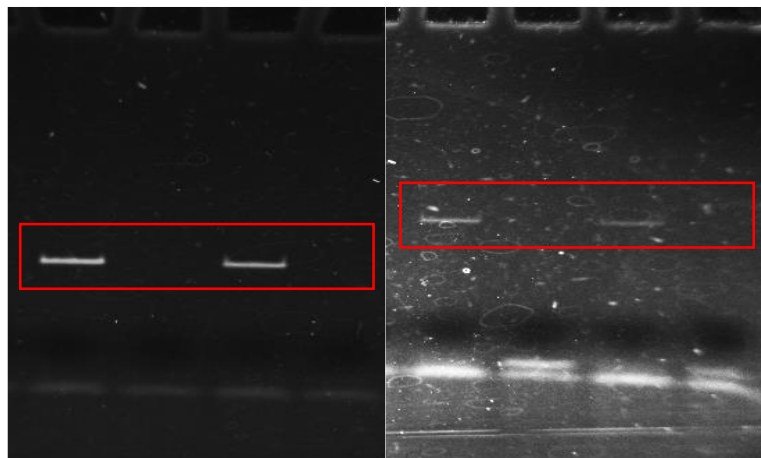

Figure 3(d) P3

Figure 3(d) P4

Supplementary Figure S10. Full-length gels/blots of Figure 3(b) and (d)

# Supplementary Figure S11.

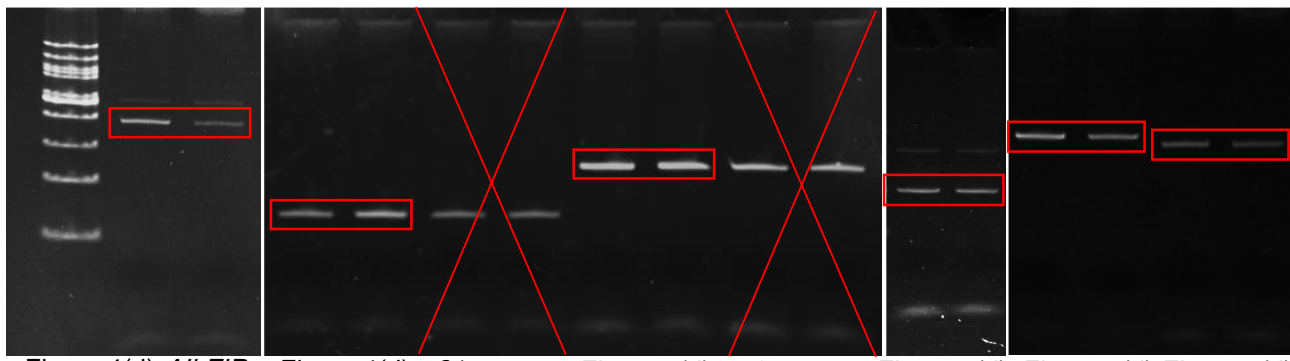

Figure 4(d) *AlbZIP*    Figure 4(d) *p21*    Figure 4(d) *p53*    Figure 4(d) *p27*    Figure 4(d) *CCNA2*    Figure 4(d) *CCNE1*

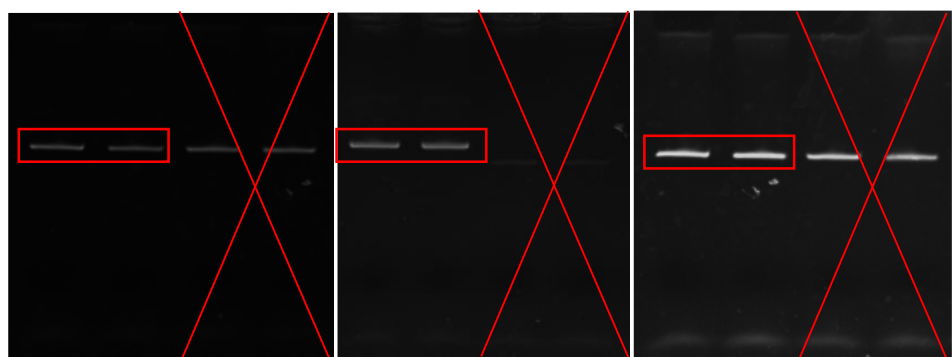

Figure 4(d) *CDK2*    Figure 4(d) *CDK4*    Figure 4(d) *GAPDH*

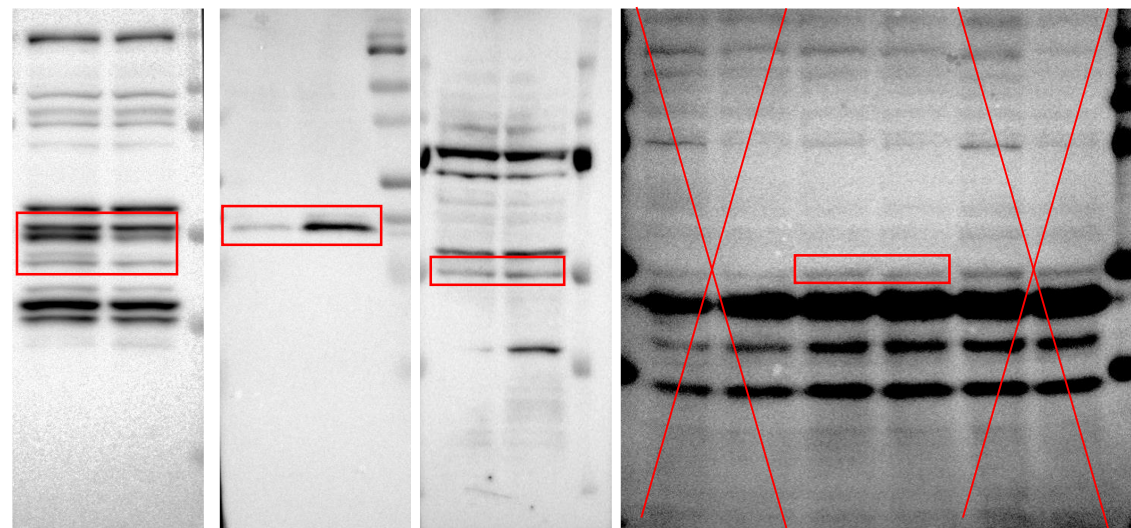

Figure 4(e) *AlbZIP*    Figure 4(e) *p21*    Figure 4(e) *p53*    Figure 4(e) *ser15p53*

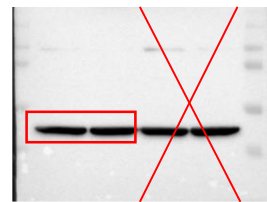

Figure 4(e)  $\beta$ -actin

## Supplementary Figure S11. Full-length gels/blots of Figure 4(d) and (e)



# Supplementary Figure S12.

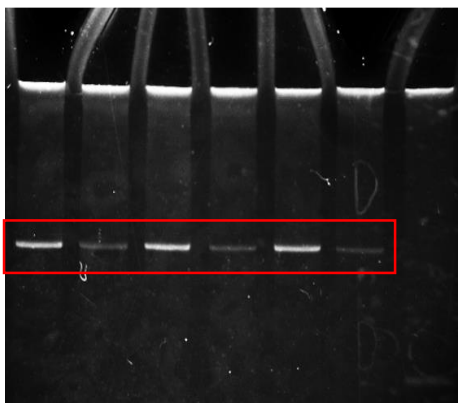

Figure 5(a) *AlbZIP*

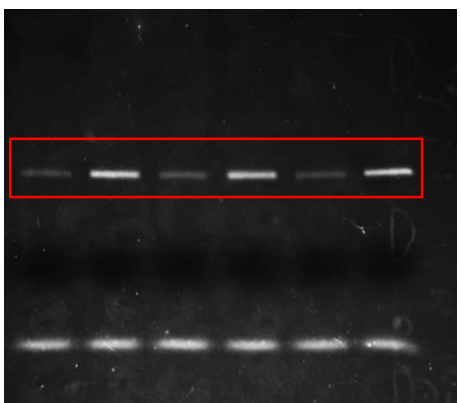

Figure 5(a) *p21*

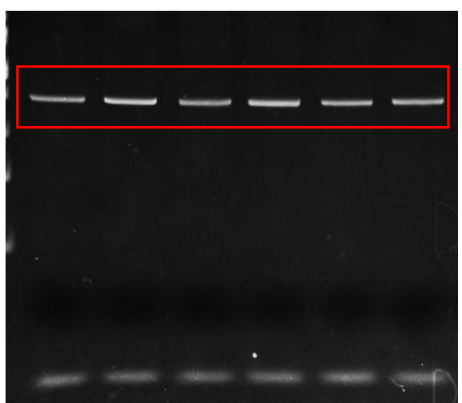

Figure 5(a) *GAPDH*

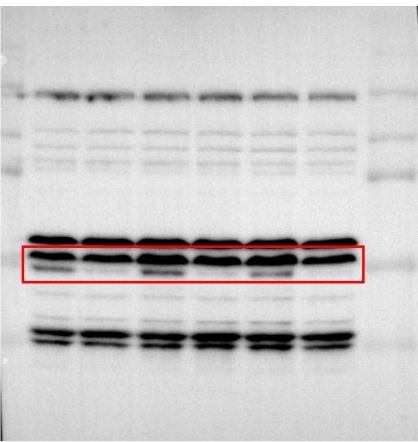

Figure 5(c) *AlbZIP*

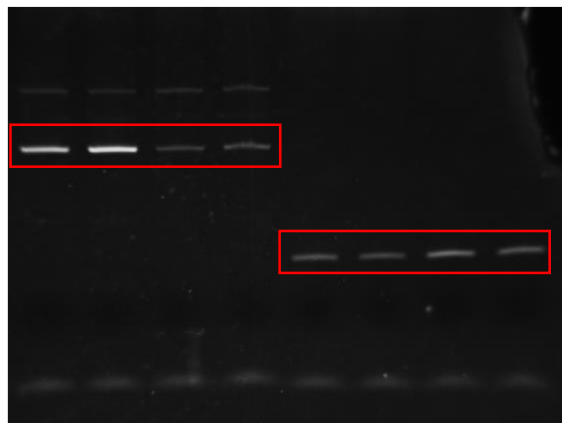

Figure 5(f) *AlbZIP*

Figure 5(f) *p21*

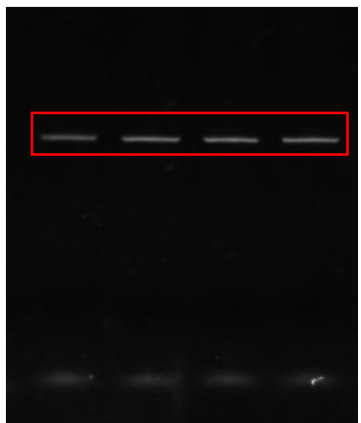

Figure 5(f) *GAPDH*

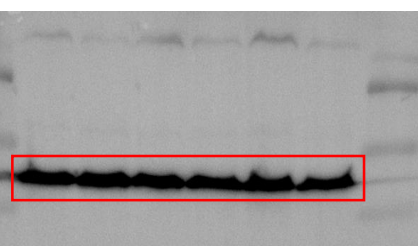

Figure 5(c)  $\beta$ -actin

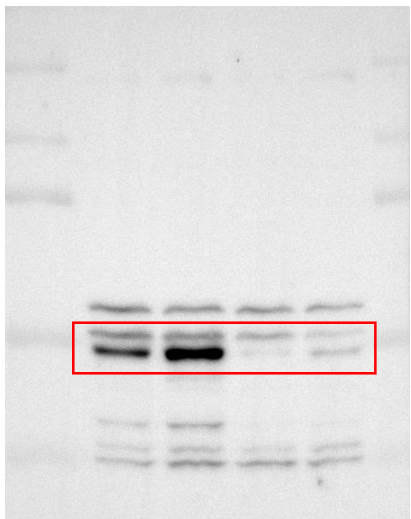

Figure 5(h) *AlbZIP*

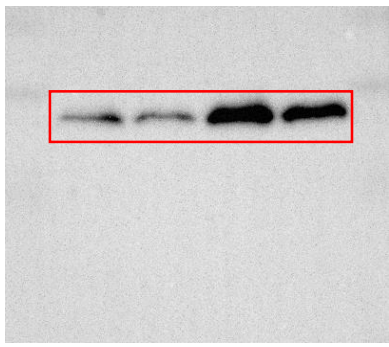

Figure 5(h) *p21*

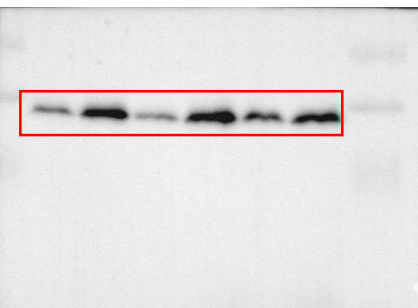

Figure 5(c) *p21*

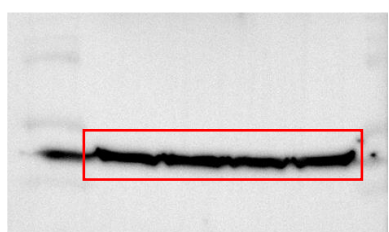

Figure 5(h)  $\beta$ -actin

# Supplementary Figure S13.

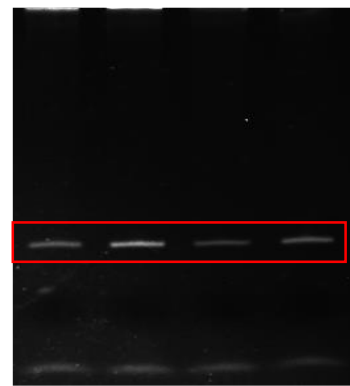

Figure 6(a) *p21*

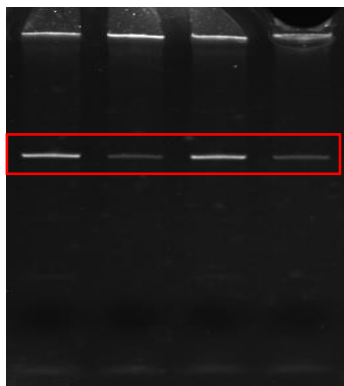

Figure 6(a) *AlbZIP*

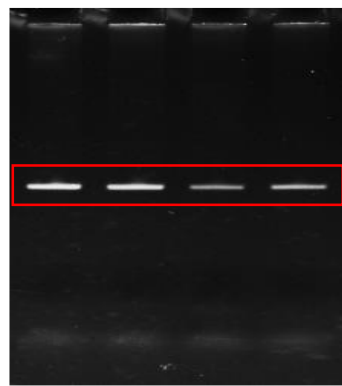

Figure 6(a) *OASIS*

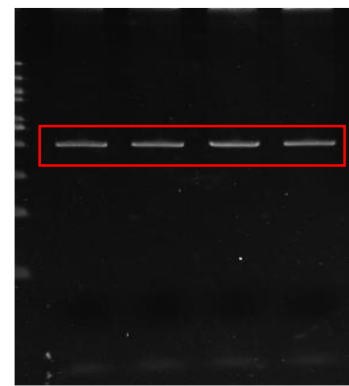

Figure 6(a) *GAPDH*

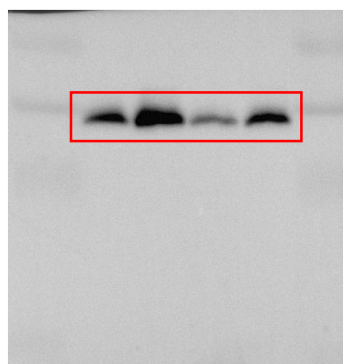

Figure 6(c) p21

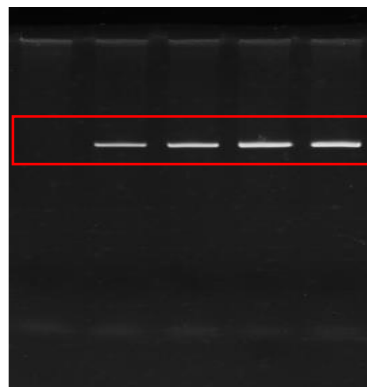

Figure 6(e) *AlbZIP*

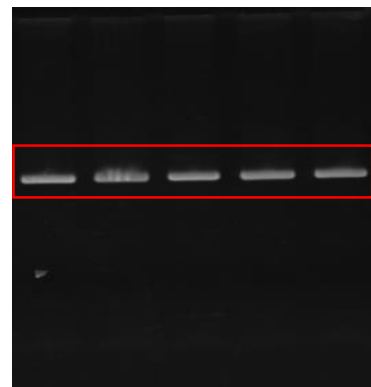

Figure 6(e) *OASIS*

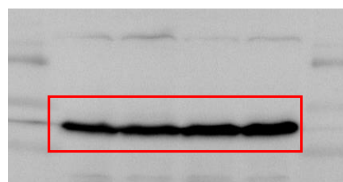

Figure 6(c)  $\beta$ -actin

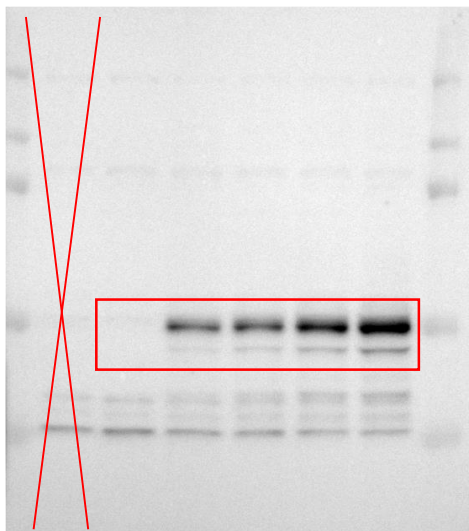

Figure 6(e) Myc-*AlbZIP*

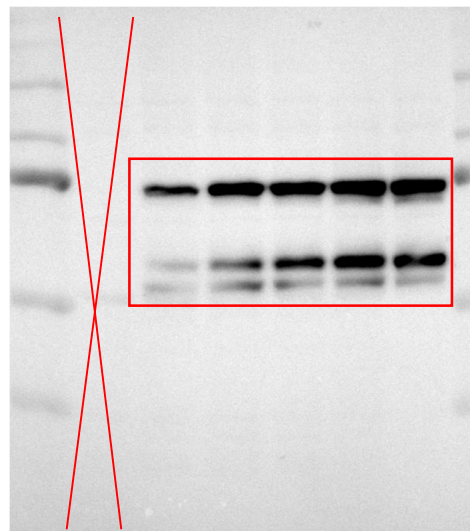

Figure 6(e) FLAG-*OASIS*

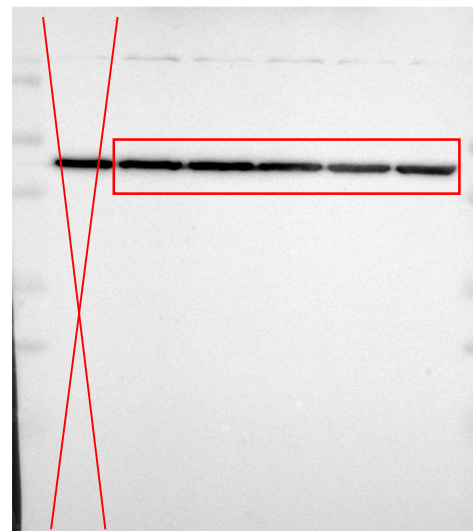

Figure 6(e)  $\beta$ -actin

# Supplementary Figure S14.

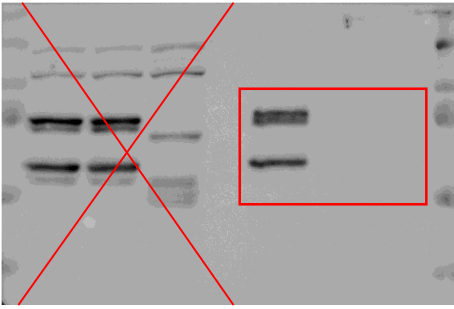

Figure 7(a) WB:OASIS  
IP:AlbZIP

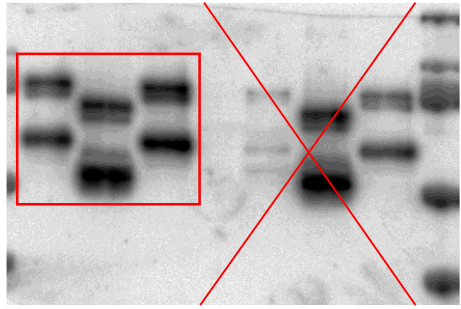

Figure 7(a) WB:OASIS  
IP:OASIS

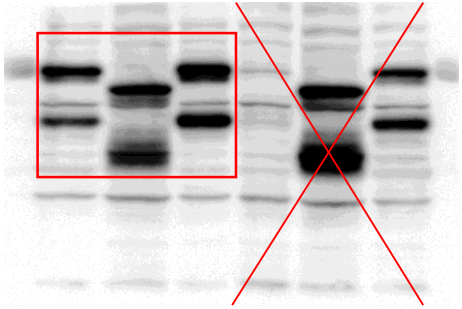

Figure 7(a) WB:OASIS  
Input

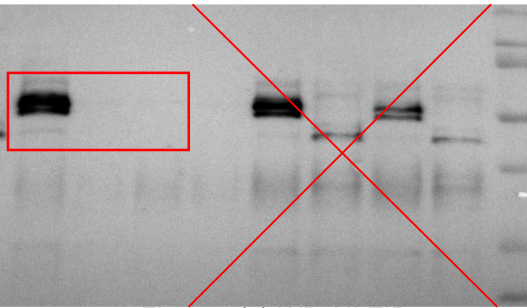

Figure 7(a) WB:AlbZIP  
IP:OASIS

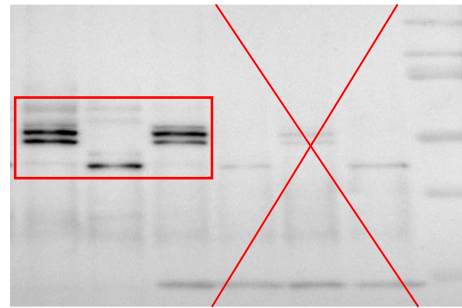

Figure 7(a) WB:AlbZIP  
IP:AlbZIP

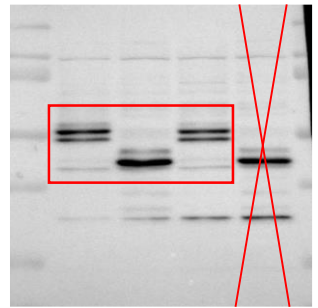

Figure 7(a) WB:AlbZIP  
Input

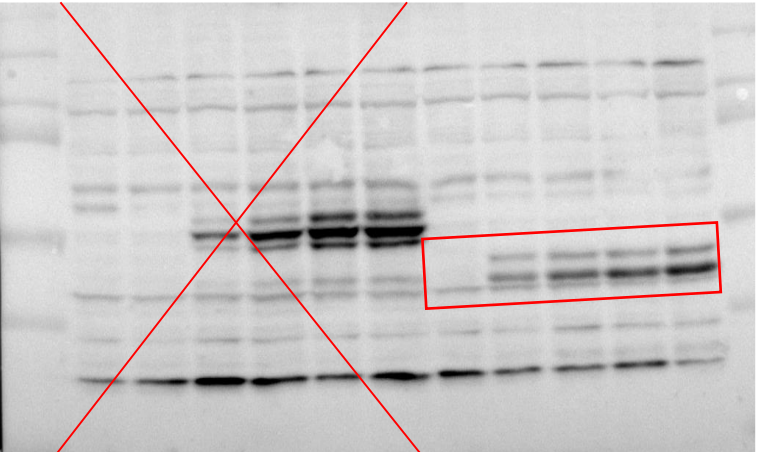

Figure 7(e) Myc-AlbZIP ΔbZIP

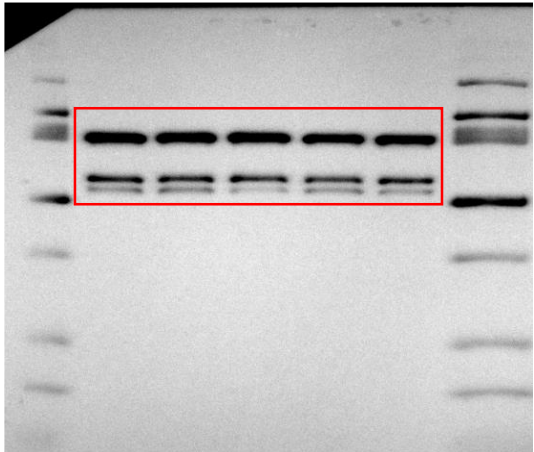

Figure 7(e) FLAG-OASIS

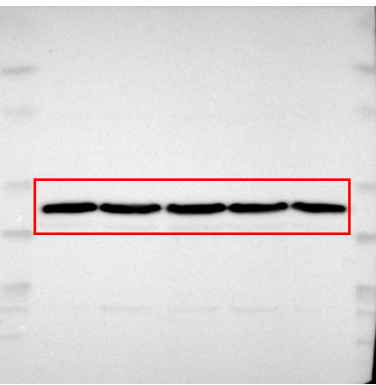

Figure 7(e) β-actin

Supplementary Figure S14. Full-length blots of Figure 7(a) and (e)

# Supplementary Table 1.

| List of primers used for plasmids construction |                    |                                                                                              |
|------------------------------------------------|--------------------|----------------------------------------------------------------------------------------------|
| Gene                                           | Primer             | forward primer                                                                               |
| FLAG-AlbZIP                                    | forward<br>reverse | 5'-GGTACCATGGACTACAAGGATGACGATGACAAGGATCTCGGAATCCCTGAC-3'<br>5'-TCACATCTCATCTGCATGCAG-3'     |
| Myc-AlbZIP                                     | forward<br>reverse | 5'-ATGGAACAGAACTGATCTCTGAAGAAGACATGACAAGGATCTCGGAATCCCTGAC-3'<br>5'-TCACATCTCATCTGCATGCAG-3' |
| Myc-AlbZIP $\Delta$ bZIP                       | forward<br>reverse | 5'-TCCTCCAGACGCTAATTGCTCAAAC-3'<br>5'-GTCTGGAGGACCCTCTCCTCTGCC-3'                            |
| FLAG-SPDEF                                     | forward<br>reverse | 5'-CCACCATGGACTACAAGGATGACGATGACAAGATGGGCAGCGCCAG-3'<br>5'-TCAGATGGGGTGCACGAACTGGTAG -3'     |
| FLAG-SPDEF $\Delta$ ETS                        | forward<br>reverse | 5'-GCGGCCGCTCGAGTCTAGAGGGCCC-3'<br>5'-TCACTGCCCGGAGCATGATGAGTCCACC-3'                        |
| FLAG-SPDEF $\Delta$ SAM                        | forward<br>reverse | 5'-GATGAAAGAGCGGACTTCACC-3'<br>5'-GCCACCACCATGGACTGCAC-3'                                    |
| AlbZIP-5k                                      | forward<br>reverse | 5'-CAAGTGACTTATTCAGGGAGACTGC-3'<br>5'-CGGAAAGAGTCAAGAGACCTG-3'                               |
| AlbZIP-5k to -1.7k                             | forward<br>reverse | 5'-CAAGTGACTTATTCAGGGAGACTGC-3'<br>5'-CCTTCCGACGAAACAGAGAAGTGATG-3'                          |
| AlbZIP-3k to -1.7k                             | forward<br>reverse | 5'-CTGGGCAACAACAGCGAAAC-3'<br>5'-CCTTCCGACGAAACAGAGAAGTGATG-3'                               |
| AlbZIP-1.7k                                    | forward<br>reverse | 5'-GGAAGGCTGCTTTGTCTCTTCACTAC-3'<br>5'-CGGAAAGAGTCAAGAGACCTG-3'                              |
| AlbZIP-1.0k                                    | forward<br>reverse | 5'-CCTGGACCATCAGACATTAGAC-3'<br>5'-CGGAAAGAGTCAAGAGACCTG-3'                                  |



## Supplementary Table 2.

| List of antibodies       |         |            |                                    |
|--------------------------|---------|------------|------------------------------------|
| antibody name            | species | type       | Manufacturer                       |
| anti- $\beta$ -actin     | mouse   | monoclonal | A2228, Sigma-Aldrich               |
| anti-AlbZIP              | mouse   | monoclonal | H00148327-AP51, Abnova             |
| anti-FLAG M2             | mouse   | monoclonal | F3165, Sigma-Aldrich               |
| anti-FLAG                | rabbit  | polyclonal | 600-401-383, ROCKLAND              |
| anti-p21                 | mouse   | monoclonal | SC-6246, Santa Cruz Biotechnology  |
| anti-p53                 | mouse   | monoclonal | #9282, Cell Signaling Technology   |
| anti-phospho-p53 (Ser15) | rabbit  | polyclonal | #9284, Cell Signaling Technology   |
| anti-Myc                 | mouse   | monoclonal | M192-3, MBL                        |
| anti-Myc                 | rabbit  | polyclonal | 562, MBL                           |
| anti-calnexin            | mouse   | monoclonal | ADI-SPA-860, Enzo                  |
| anti-GM130               | rabbit  | polyclonal | D6B1, Cell Signaling Technology    |
| anti-Histone H3          | mouse   | monoclonal | SC-10809, Santa Cruz Biotechnology |
| anti-mouse IgG           | mouse   | monoclonal | G3A1, Cell Signaling Technology    |
| anti-rabbit IgG          | rabbit  | polyclonal | Cell Signaling Technology          |

## Supplementary Table 3.

List of primers used for RT-PCR

| Gene          | forward primer                  | revers primer                   |
|---------------|---------------------------------|---------------------------------|
| <i>AlbZIP</i> | 5'-GGTTCCGGTAACTAGGCT-3'        | 5'-AGACGCTTCTCCTCATCG-3'        |
| <i>PSA</i>    | 5'-CCAGACACTCACAGCAAGGA-3'      | 5'-CTGAGGGTTGTCTGGAGGAC-3'      |
| <i>BiP</i>    | 5'-GTTTGCTGAGGAAGACAAAAAGCTC-3' | 5'-CACTTCCATAGAGTTTGCTGATAAT-3' |
| <i>XBP1</i>   | 5'-CAGCAGGTGCAGGCCAGTTGTC-3'    | 5'-GACACTAATCAGCTGGGGAAAGAC-3'  |
| <i>AR</i>     | 5'-TCCAAATCACCCCCCAGGAA-3'      | 5'-GACATCTGAAAGGGGGCATG-3'      |
| <i>SPDEF</i>  | 5'-GTCAGCGGCCTGGATGAAAGA-3'     | 5'-AAGATGCCCTTCTCCTTGTTG-3'     |
| <i>p21</i>    | 5'-GGAAGACCATGTGGACCTGT-3'      | 5'-GGCGTTTGGAGTGGTAGAAA-3'      |
| <i>p53</i>    | 5'-AGTCACAGCACATGACGGAGG-3'     | 5'-TGGAGTCTTCCAGTGTGATGATG-3'   |
| <i>p27</i>    | 5'-CAGCTTGCCCGAGTTCTACTACAG-3'  | 5'-AGGTCGCTTCTCATCCCTG-3'       |
| <i>CCNE1</i>  | 5'-CCAGGAAGAGGAAGGCAAACG-3'     | 5'-GTGTTGCTCAAGAAAGTGCTG-3'     |
| <i>CCNA2</i>  | 5'-GCATGTCACCGTTCCTCCTTG-3'     | 5'-GTGATGTCTGGCTGTTTCTTC-3'     |
| <i>CDK2</i>   | 5'-GGGCCTAGCTTTCTGCCATTC-3'     | 5'-GGAACTTGGCTTGTAAATCAGG-3'    |
| <i>CDK4</i>   | 5'-CTTCCCATCAGCACAGTTCG-3'      | 5'-GGTGTAAGTGCCATCTGGTAG-3'     |
| <i>OASIS</i>  | 5'-GAACATGGAGGACTTCTCCAATG-3'   | 5'-CGGGCTCTGCTCCTGCTTCAC-3'     |
| <i>GAPDH</i>  | 5'-AGGTGAAGGTCGGAGTCAAC-3'      | 5'-GACGGTGCCATGGAATTTGC-3'      |

## Supplementary Table 4.

| List of siRNA sequences |                             |                             |
|-------------------------|-----------------------------|-----------------------------|
| Gene                    | sense                       | anti-sense                  |
| scramble                | 5'-UUCUCCGAACGUGUCACGU-3'   | 5'-ACGUGACACGUUCGGAGAA-3'   |
| <i>AlbZIP</i> #1        | 5'-GAACCAAGAAUACAGAAA-3'    | 5'-UUUCUGUAAUUCUUGGUUC-3'   |
| <i>AlbZIP</i> #2        | 5'-CAGAAAAUCUGGAGACCCA-3'   | 5'-UGGGUCUCCAGAUUUUCUG-3'   |
| <i>AlbZIP</i> #3        | 5'-GGAAUAAGUUUUGAGUGA-3'    | 5'-UCACUCAAACUUAUUC-3'      |
| <i>AR</i>               | 5'-AAGAAGGCCAGUUGUAUGGAC-3' | 5'-GUCCAUACAACUGGCCUUCUU-3' |
| <i>SPDEF</i>            | 5'-CCUUCUACCUCUCCUACUU-3'   | 5'-AAGUAGGAGAGGUAGAAGG-3'   |

## Supplementary Table 5.

| List of primers used for ChIP assay |                                 |                                  |
|-------------------------------------|---------------------------------|----------------------------------|
| primer number                       | forward primer                  | revers primer                    |
| 1                                   | 5'-CTGAGTTTTGGTATTACTACTTTTC-3' | 5'-CATACAGTTACCGGGAACAT-3'       |
| 2                                   | 5'-TGCTGTTCTCCATTAACGCCACAC-3'  | 5'-AGTCAACAGCCCGCTGACCC-3'       |
| 3                                   | 5'-TGGGGTCAGCGGGCTGTTGAC-3'     | 5'-GTCAGGCGGGGATTGGGTTC-3'       |
| 4                                   | 5'-ACCCAATCCCCGCCTGACAAATAAG-3' | 5'-TGGCTGTTTCAGGAGAGTCAGGCCAA-3' |
